# Supplementary material for: Defect and dopant properties of the α- and β-polymorphs of the Li3FeF6 lithium battery material
Source: Royal Society of Chemistry journal article supplement (doi:10.1039/c3ta10630f), 2013-01-01
Supplement: c3ta10630f.pdf [file c3ta10630f.pdf]

## Defect and dopant properties of the $\alpha$ - and $\beta$ -polymorphs of the $\text{Li}_3\text{FeF}_6$ lithium battery material

### Supporting information

Table S1. Calculated and Experimental Mean Bond Distances for Monoclinic and Orthorhombic  $\text{Li}_3\text{FeF}_6$ .

#### a) Monoclinic (C2/c)

| Parameter | <i>Calc</i> | <i>Expt</i> | $\Delta$ (Å) |
|-----------|-------------|-------------|--------------|
| Fe1-F4    | 2.067       | 1.944       | 0.123        |
| Fe1-F6    | 2.055       | 1.894       | 0.160        |
| Fe1-F8    | 2.081       | 1.927       | 0.154        |
|           |             |             |              |
| Fe2-F1    | 2.049       | 1.952       | 0.098        |
| Fe2-F2    | 2.057       | 1.895       | 0.161        |
| Fe2-F3    | 2.058       | 1.929       | 0.128        |
| Fe2-F5    | 2.052       | 1.921       | 0.131        |
| Fe2-F7    | 2.088       | 1.954       | 0.134        |
| Fe2-F9    | 2.079       | 1.967       | 0.112        |
|           |             |             |              |
| Li1-Fe1   | 2.892       | 2.964       | -0.072       |
| Li1-F1    | 2.012       | 1.971       | 0.041        |
| Li1-F6    | 1.946       | 2.062       | -0.116       |
| Li1-F8    | 1.975       | 2.009       | -0.034       |
|           |             |             |              |
| Li2-F1    | 1.861       | 1.984       | -0.123       |
| Li2-F2    | 1.859       | 1.849       | 0.009        |
| Li2-F4    | 1.910       | 1.929       | -0.018       |
| Li2-F5    | 2.274       | 2.553       | -0.279       |
| Li2-F6    | 2.939       | 2.963       | -0.024       |
| Li2-F7    | 2.267       | 2.419       | -0.151       |
|           |             |             |              |

#### b) Orthorhombic Pna2<sub>1</sub>

| Parameter | <i>Calc</i> | <i>Expt</i> | $\Delta$ (Å) |
|-----------|-------------|-------------|--------------|
| Fe1-F1    | 2.081       | 2.022       | 0.059        |
| Fe1-F2    | 2.065       | 1.992       | 0.073        |
| Fe1-F3    | 2.063       | 1.919       | 0.144        |
| Fe1-F4    | 2.058       | 1.806       | 0.252        |
| Fe1-F5    | 2.058       | 2.046       | 0.012        |
| Fe1-F6    | 2.096       | 1.865       | 0.231        |
|           |             |             |              |
| Fe2-F5    | 2.052       | 1.921       | 0.131        |
| Fe2-F7    | 2.088       | 1.954       | 0.134        |

|         |       |       |        |
|---------|-------|-------|--------|
| Fe2-F9  | 2.079 | 1.967 | 0.112  |
|         |       |       |        |
| Li1-Fe1 | 2.892 | 2.964 | -0.072 |
| Li1-F1  | 2.011 | 1.971 | 0.040  |

Table S2. Interatomic Potential Parameters for the monovalent and divalent dopants.

| Interaction                       | $A$ (eV) | $\rho$ (Å) | $C$ (eV Å <sup>6</sup> ) | Lattice energy (eV) |
|-----------------------------------|----------|------------|--------------------------|---------------------|
| Na <sup>+</sup> - F <sup>-</sup>  | 1497.45  | 0.2589     | 0.00                     | -11.13              |
| K <sup>+</sup> - F <sup>-</sup>   | 1701.31  | 0.2963     | 13.70                    | -9.72               |
| Ni <sup>2+</sup> - F <sup>-</sup> | 907.90   | 0.2816     | 0.00                     | -29.95              |
| Mg <sup>2+</sup> - F <sup>-</sup> | 841.30   | 0.2831     | 0.00                     | -30.12              |
| Co <sup>2+</sup> - F <sup>-</sup> | 917.20   | 0.2856     | 0.00                     | -29.47              |
| Mn <sup>2+</sup> - F <sup>-</sup> | 1000.70  | 0.2926     | 0.00                     | -28.34              |
| Cd <sup>2+</sup> - F <sup>-</sup> | 1057.60  | 0.3059     | 10.00                    | -27.35              |
| Ca <sup>2+</sup> - F <sup>-</sup> | 1.00     | 1534.3     | 0.29                     | -27.09              |
| Sr <sup>2+</sup> - F <sup>-</sup> | 3400.00  | 0.2906     | 0.00                     | -24.47              |
| Ba <sup>2+</sup> - F <sup>-</sup> | 1746.90  | 0.3237     | 16.70                    | -23.94              |

Table S3. Solution Energies of monovalent and divalent dopants on Li and Fe Sites as a function of ion size in monoclinic and orthorhombic Li<sub>3</sub>FeF<sub>6</sub>.

| Dopant           | Radii(Å) | Energy (eV) |              |            |              |
|------------------|----------|-------------|--------------|------------|--------------|
|                  |          | Li site     |              | Fe site    |              |
|                  |          | Monoclinic  | Orthorhombic | Monoclinic | Orthorhombic |
| Na <sup>+</sup>  | 1.02     | -0.54       | 0.34         | 0.50       | 2.19         |
| K <sup>+</sup>   | 1.38     | 0.79        | 1.19         | 1.01       | 2.88         |
| Ni <sup>2+</sup> | 0.69     | 0.55        | 1.32         | -0.62      | -0.21        |
| Mg <sup>2+</sup> | 0.72     | 0.55        | 1.34         | -0.78      | -0.25        |
| Co <sup>2+</sup> | 0.74     | 0.61        | 1.42         | -0.53      | -0.14        |
| Mn <sup>2+</sup> | 0.83     | 0.54        | 1.53         | -0.18      | 0.07         |
| Cd <sup>2+</sup> | 0.95     | 0.95        | 1.72         | -0.29      | 0.38         |
| Ca <sup>2+</sup> | 1.00     | 1.09        | 1.93         | -0.09      | 0.60         |
| Sr <sup>2+</sup> | 1.2      | 2.08        | 3.00         | 0.72       | 1.69         |
| Ba <sup>2+</sup> | 1.35     | 2.34        | 3.16         | 0.94       | 1.89         |
